# Supplementary material for: Paladin is a phosphoinositide phosphatase regulating endosomal VEGFR2 signalling and angiogenesis
Source: PubMed Central journal article supplement (PMC7857541; doi:10.15252/embr.202050218), 2020-12-28
Supplement: EMBR-22-e50218-s001.pdf [file EMBR-22-e50218-s001.pdf]

**Paladin is a phosphoinositide phosphatase that regulates endosomal signaling and angiogenesis**

Anja Nitzsche, Riikka Pietilä, Dominic T. Love, Chiara Testini, Takeshi Ninchoji, Ross O. Smith, Elisabet Ekvärn, Jimmy Larsson, Francis P. Roche, Isabel Egaña, Suvi Jauhiainen, Philipp Berger, Lena Claesson-Welsh and Mats Hellström

**APPENDIX**

S1: Control staining for Paladin after siRNA-mediated Paladin knockdown

S2: Actual p-values

Appendix figure S1

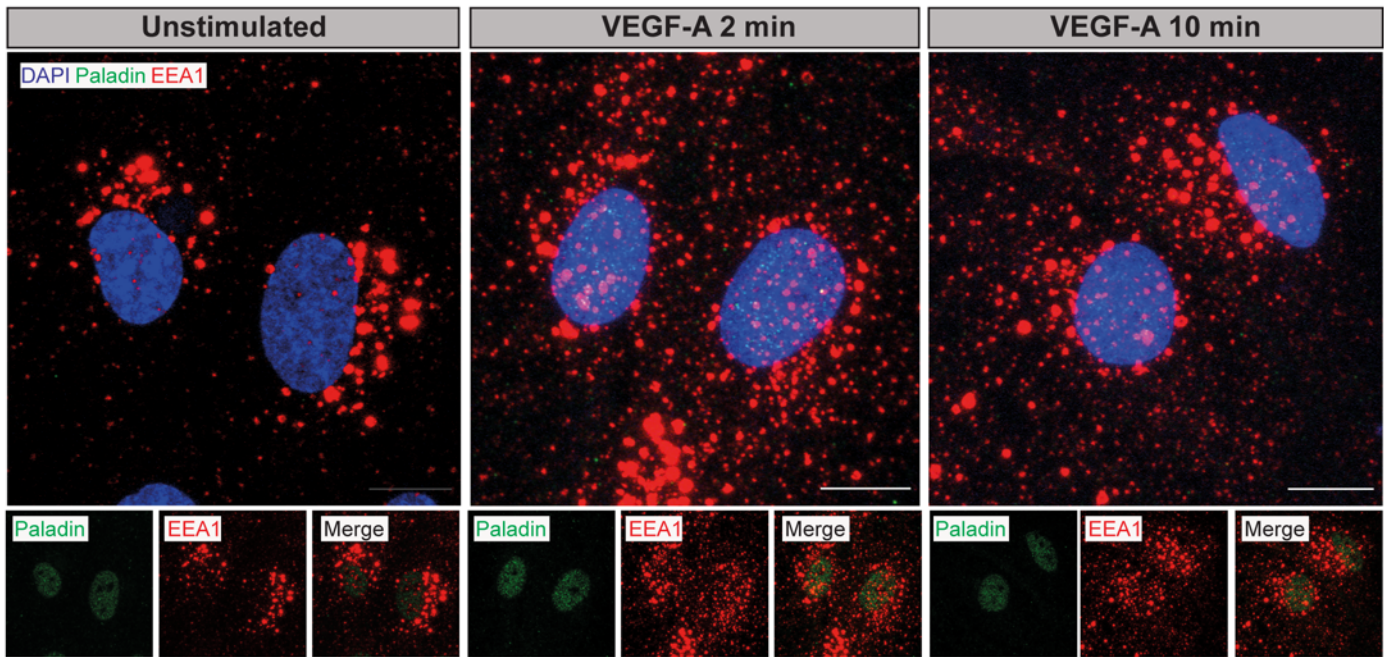

EEA1 (red), Paladin (green) and DAPI (blue) staining of siRNA *PALD1* knock-down cells after VEGF-A stimulation for indicated time points

## Appendix S2

### Exact p-values

| <b>Figure 1</b>   | <b>Left</b> | <b>Right</b> |
|-------------------|-------------|--------------|
| <b>a</b>          | 0.0438      | 0.0362       |
| <b>d</b>          | 0.0122      | 0.0040       |
| <b>f (top)</b>    | 0.0009      | <0.0001      |
| <b>f (bottom)</b> | 0.0062      | 0.0240       |
| <b>h</b>          | 0.0387      |              |

| <b>Figure 2</b>   | <b>Left</b> | <b>Right</b> | <b>Figure EV 2</b> | <b>Left</b> | <b>Right</b> |
|-------------------|-------------|--------------|--------------------|-------------|--------------|
| <b>d</b>          | 0.0136      |              | <b>a</b>           | 0.0105      | 0.0006       |
| <b>f (top)</b>    | 0.0035      | 0.0364       | <b>d</b>           | 0.0039      |              |
| <b>f (bottom)</b> | 0.0021      | 0.0029       |                    |             |              |
| <b>h (top)</b>    | <0.0001     |              |                    |             |              |
| <b>h (bottom)</b> | 0.0001      |              |                    |             |              |

| <b>Figure 3</b> | <b>Left</b> | <b>Right</b> | <b>Figure EV 3</b> | <b>Left</b> | <b>Right</b> |
|-----------------|-------------|--------------|--------------------|-------------|--------------|
| <b>b</b>        | 0.0443      |              | <b>a</b>           | 0.0302      | 0.0017       |
| <b>d</b>        | 0.0102      | 0.0035       |                    |             |              |
| <b>f</b>        | 0.0099      |              |                    |             |              |

| <b>Figure 4</b> | <b>Left</b> | <b>Right</b> | <b>Figure EV 4</b> | <b>Left</b>    | <b>Right</b>    |
|-----------------|-------------|--------------|--------------------|----------------|-----------------|
| <b>b</b>        | 0.0051      |              | <b>a</b>           | 0.0191         |                 |
| <b>d</b>        | 0.0047      |              | <b>b</b>           | 0.0029         | 0.0403          |
| <b>f</b>        | 0.0138      | 0.0004       | <b>c</b>           | 0.0371 (first) | 3.25E-10 (last) |
| <b>h</b>        | 0.0143      |              |                    |                |                 |
| <b>i</b>        | 0.0192      |              |                    |                |                 |
| <b>l</b>        | 0.0341      |              |                    |                |                 |
| <b>m</b>        | 0.0071      | 0.0151       |                    |                |                 |

| <b>Figure 5</b> |        |
|-----------------|--------|
| <b>b</b>        | 0.0265 |
| <b>e</b>        | 0.0015 |
| <b>h</b>        | 0.0451 |
